# Supplementary material for: Dietary Intake across Reproductive Life Stages of Women in India: A Cross-Sectional Survey from 4 Districts of India
Source: Hindawi journal article supplement (doi:10.1155/2020/9549214), 2020-06-29
Supplement: f1 [file 9549214.f1.pdf]

**Supplementary Table 1. Recommended Dietary Allowances for Indians (Macronutrients and Minerals)**

| Target groups                   | Energy Kcal/d | Visible fat g/d | Protein g/d | Iron mg/d | Calcium mg/d |
|---------------------------------|---------------|-----------------|-------------|-----------|--------------|
| Pregnant women                  | 2250          | 30              | 78          | 35        | 1200         |
| Lactating women                 | 2420          | 30              | 71          | 21        | 1200         |
| Adolescent Girls<br>10-12 years | 2010          | 35              | 40.4        | 27        | 800          |
| 13-15 years                     | 2330          | 40              | 51.9        | 27        | 800          |
| 16-17 years                     | 2440          | 35              | 55.5        | 26        | 800          |
| 18-19 years                     | 1900          | 20              | 55          | 21        | 800          |
| Adolescent boys<br>10-12 years  | 2190          | 35              | 39.9        | 21        | 800          |
| 13-15 years                     | 2750          | 45              | 54.3        | 32        | 800          |
| 16-17 years                     | 3020          | 50              | 61.5        | 28        | 800          |
| 18-19 years                     | 2320          | 25              | 60          | 17        | 800          |
| Young female                    | 1900          | 20              | 55          | 21        | 600          |
| Young male                      | 2320          | 25              | 60          | 17        | 600          |

\*g/d-grams/day; mg/d-milligrams/day; Kcal/d-Kilocalories/day

*Source: Dietary guidelines for Indians, Indian Council of Medical Research 2010*
